# Supplementary material for: Slow-moving soil organisms on a water highway: aquatic dispersal and survival potential of Oribatida and Collembola in running water
Source: Mov Ecol. 2019 Jul 2;7:20. doi: 10.1186/s40462-019-0165-5 (PMC6604229; doi:10.1186/s40462-019-0165-5)
Supplement: Supplementary file 1 — Individual numbers of all oribatid mite species recorded in the field and used in the lab experiments and their main habitat preference after Weigmann et al. 2015. Collembola were only identified from aquarium nets and floating islands; habitat preference are taken from Fjellberg 1998 and 2007. (XLSX 21 kb) [file 40462_2019_165_MOESM1_ESM.xlsx]

## Sheet: Add. file 1total species list
		abbreviation	species pool		field study			lab study		main habitat ¹	body length in μm ²		¹ Weigmann G, Horak F, Franke K, Christian A. Verbreitung und Ökologie der Hornmilben (Oribatida) in Deutschland. Peckiana. 2015;10:1-171.
Oribatida taxa			soil	moss	sticky covers	aquarium nets	floating islands	floating	survival				acronym	main habitat
Achipteriidae	Achipteria coleoptrata (Linné, 1758)	Ach col	18					7	12	s	530–650		ar	arboricolous-bark dweller
	Achipteria nitens (Nicolet, 1855)	Ach nit		26						s	600–780		s	soil dweller
	Parachipteria fanzagoi (Jacot, 1929)	Par fan	1	15				12	24	ar/e	550–700		ar/s	arboricolous-bark dweller/soil dweller
	Parachipteria punctata (Nicolet, 1855)	Par pun		116						s	475–585		ar/e	arboricolous-bark dweller/ epilithic-on stones, rocks or walls
Astegistidae	Astegistes pilosus (C.L. Koch, 1840)	Ast pil					1			s	560–630		s/e	soil dweller/ epilithic-on stones, rocks or walls
Brachychthoniidae	Liochthonius tuxeni (Forsslund, 1957)	Lio tux				3				s	192–205		epi	epiphytic-on plants
	Neobrachychthonius marginatus magnus Moritz, 1976	Neo mag		12						s	230–265		aq	aquatic
	Poecilochthonius spiciger (Berlese, 1910)	Poe spi				1				s	175–208		u	unknown
	Sellnickochthonius immaculatus (Forsslund, 1942)	Sel imm	1							s	170–195
Camisiidae	Camisia horrida (Hermann, 1804)	Cam hor			3	1				ar	825–960		² Weigmann G. Hornmilben (Oribatida). - Die Tierwelt Deutschlands (76). Keltern: Goecke & Evers; 2006.
	Camisia segnis (Hermann, 1804)	Cam seg			2					ar/s	830–900		³ only notogaster length
	Platynothrus peltifer (C.L. Koch, 1839)	Pla lae	1							s	770–980
Carabodidae	Carabodes labyrinthicus (Michael, 1879)	Car lab			3					s	430–580
	Carabodes ornatus Storkan, 1925	Car orn							10	s	540–690
	Carabodes rugosior Berlese, 1916	Car rug				1				s	520–650
	Carabodes subarcticus Trägårdh, 1902	Car sub		1				7	24	s	400–490
Ceratozetidae	Ceratozetes peritus Grandjean, 1951	Cer per	19						9	s	590–640
	Ceratozetes sellnicki Rajski, 1958	Cer sel	1							s	470–500
	Ceratozetoides maximus (Berlese, 1908)	Cer max		1						s	710–945
	Fuscozetes fuscipes (C.L. Koch, 1844)	Fus fus	1		1					s	630–765
	Trichoribates cf. novus (Sellnick, 1928)	Tri nov					1			s	650–820
	Trichoribates novus (Sellnick, 1928)	Tri nov		4	7	3				s	650–820
	Trichoribates trimaculatus (C.L. Koch, 1835)	Tri tri			3	3				ar/s	560–680
Chamobatidae	Chamobates cf. pusillus (Berlese, 1895)	Cha pus		3						s	370–470
	Chamobates cuspidatus (Michael, 1884)	Cha cus	7	1						s	340–435
	Globozetes cf. longipilus Sellnick, 1928	Glo lon				1				ar/s/e	485–560
Cymbaeremaeidae	Cymbaeremaeus cymba (Nicolet, 1855)	Cym cym			16	1				ar	690–800
Damaeidae	Belba corynopus (Hermann, 1804)	Bel cor	9							s	670–830
	Damaeus (Adamaeus) onustus C.L. Koch, 1844	Dam onu	5							s	1350–1600
Euphthiracaridae	Acrotritia ardua (C.L. Koch, 1841)	Acr ard	3							s	480–620 ³
Euzetidae	Euzetes globulus (Nicolet, 1855)	Euz glo	1							s	1070–1160
Galumnidae	Galumna lanceata (Oudemans, 1900)	Gal lan	1		1	1	1			s	530–670
	Galumna obvia (Berlese, 1914)	Gal obv	10	4	1	1		6		s	705–845
	Pergalumna nervosa (Berlese, 1914)	Per ner						8	17	s	580–700
Haplozetidae	Protoribates capucinus Berlese, 1908	Pro cap	68							s	320–440
	Protoribates dentatus (Berlese, 1883)	Pro den				1				s	470–555
Hydrozetidae	Hydrozetes lacustris (Michael, 1882)	Hyd lac				3	1			aq	450–510
	Hydrozetes lemnae (Coggi, 1897)	Hyd lem					1			aq	375–505
Hypochthoniidae	Hypochthonius rufulus C.L. Koch, 1835	Hyp ruf	13		1			4	11	s	650–700
Liacaridae	Liacarus coracinus (C.L. Koch, 1841)	Lia cor	2						8	s	650–1100
	Liacarus subterraneus (C.L. Koch, 1841)	Lia sub	2							s	810–1200
	Xenillus tegeocranus (Hermann, 1804)	Xen teg	6							s	720–1100
Micreremidae	Micreremus brevipes (Michael, 1888)	Mic bre			12					ar	260–320
Mycobatidae	Minunthozetes semirufus (C.L. Koch, 1841)	Min sem	45							s	290–320
	Punctoribates hexagonus Berlese, 1908	Pun hex	9	21	13	3	1			s	320–350
	Punctoribates punctum (C.L. Koch, 1839)	Pun pun	37	76	4	1	1		13	s	350–410
Nanhermanniidae	Nanhermannia pectinata Strenzke, 1953	Nan pec				1				s	530–580
Nothridae	Nothrus palustris C.L. Koch, 1839	Not pal	1							s	990–1200
Opiidae	Dissorhina ornata (Oudemans, 1900)	Dis orn	1							s	250–350
	Opiella (Opiella) propinqua Mahunka & Mahunka-Papp, 2000	Opi pro	1							s	265–315
	Opiella (Rhinoppia) cf. epilata Miko, nov. spec.	Opi epi	1							u	300
	Opiella (Rhinoppia) subpectinata (Oudemans, 1900)	Opi sub	1							s	315–350
	Ramusella insculpta (Paoli, 1908)	Ram ins	1							s	210–290
Oribatellidae	Oribatella quadricornuta Michael, 1880	Ori qua		3	1					s	460–550
Oribatulidae	Oribatula tibialis (Nicolet, 1855)	Ori tib	2	7	1					s	410–530
	Phauloppia lucorum (C.L. Koch, 1841)	Pha luc				1				ar/e	600–900
	Zygoribatula exilis (Nicolet, 1855)	Zyg exi		616						ar/s/e/epi	335–425
Parakalummidae	Neoribates aurantiacus (Oudemans, 1914)	Neo aur			1					s	510–720
Peloppiidae	Ceratoppia bipilis (Hermann, 1804)	Cer bip		1	1					ar/s	700–900
Phenopelopidae	Eupelops plicatus (C.L. Koch, 1835)	Eup pli							13	s	500–680
Phthiracaridae	Atropacarus striculus (C.L. Koch, 1835)	Atr str	24							s	340–590 ³
	Phthiracarus ferrugineus (C.L. Koch, 1841)	Pht fer	5							s	350–590 ³
	Phthiracarus globosus (C.L. Koch, 1841)	Pht glo	4						15	s	470–650 ³
	Phthiracarus laevigatus (C.L. Koch, 1844)	Pht lae	1							s	500–1065 ³
	Steganacarus (Steganacarus) magnus (Nicolet, 1855)	Ste mag	6							s	700–1200 ³
Scheloribatidae	Dometorina plantivaga (Berlese, 1895)	Dom pla			23	11				ar	375–520
	Liebstadia pannonica (Willmann, 1951)	Lie pan	1		2					s	350–455
	Liebstadia similis (Michael, 1888)	Lie sim	2							s	500–600
	Scheloribates (Scheloribates) ascendens Weigmann & Wunderle, 1990	Sch asc		1		1				ar	445–545
	Scheloribates (Scheloribates) laevigatus (C.L. Koch, 1835)	Sch lae	3	6						s	520–670
	Scheloribates (Scheloribates) latipes (C.L. Koch, 1844)	Sch lat		12	4	1				s	460–550
	Scheloribates (Scheloribates) pallidulus (C.L. Koch, 1841)	Sch pal		2						s	350–450
Scutoverticidae	Scutovertex minutus (C.L. Koch, 1835)	Scu min			10					s/e	590–670
Tectocepheidae	Tectocepheus sarekensis Trägårdh, 1910	Tec sar	15	153	2					s	295–360
	Tectocepheus velatus (Michael, 1880)	Tec vel	1	26						s	280–320
Tenuialidae	Haffenrefferia gilvipes (C.L. Koch, 1839)	Haf gil				1				s	870–970
Thyrisomidae	Pantelozetes paolii (Oudemans, 1913)	Pan pao	2							s	360–425
Zetomimidae	Zetomimus furcatus (Warburton & Pearce, 1905)	Zet fur			3	1				s	440–500
	Oribatida juveniles		3	9	7	6	4
	number of individuals		335	1116	122	47	11	44	156	main habitat ⁴	body length in μm ⁴		⁴ Fjellberg A. The Collembola of Fennoscandia and Denmark, Part I: Poduromorpha. Leiden: Fauna Entomologica Scandinavica; 1998.
	number of species		40	21	23	21	7	6	11				and Fjellberg A. The Collembola of Fennoscandia and Denmark, Part II: Entomobryomorpha and Symphypleona. Leiden: Fauna Entomologica Scandinavica; 2007.
Collembola taxa
Isotomidae	Desoria trispinata (MacGillivray, 1896)	Des tri	-	-	-	1	3	-	-	s	up to 1300		s	soil dweller
	Isotomurus plumosus Bagnall, 194	Iso plu	-	-	-	18	5	-	-	s	2000-2500
Neanuridae	Neanura muscorum (Templeton, 1835)	Nea mus	-	-	-	1		-	-	s	up to 3500
Sminthurididae	Sminthurides aquaticus(Bourlet, 1842)	Smi aqu	-	-	-	7	69	-	-	s	female: up to 1000, males: 300-400
	Sminthurides malmgreni(Tullberg, 1876)	Smi mal	-	-	-		8	-	-	s	females: up to 600, males: up to 300
	Collebola juveniles		-	-	-		3	-	-
	number of individuals		-	-	-	27	88	-	-
	number of species		-	-	-	4	4	-	-
