# Supplementary material for: Slow-moving soil organisms on a water highway: aquatic dispersal and survival potential of Oribatida and Collembola in running water
Source: Mov Ecol. 2019 Jul 2;7:20. doi: 10.1186/s40462-019-0165-5 (PMC6604229; doi:10.1186/s40462-019-0165-5)
Supplement: Supplementary file 3 — Species and numbers of Oribatida found on sticky covers. (XLSX 11 kb) [file 40462_2019_165_MOESM3_ESM.xlsx]

## Sheet: Add. file 3 sticky covers
	sample site 1		sample site 2	sample site 3		sample site 4
Oribatida taxa	2016	2017	2017	2016	2017	2016
Camisia horrida (Hermann, 1804)				3
Camisia segnis (Hermann, 1804)	1		1
Carabodes labyrinthicus (Michael, 1879)					3
Ceratoppia bipilis (Hermann, 1804)						1
Cymbaeremaeus cymba (Nicolet, 1855)	1	1	2	7	4	1
Dometorina plantivaga (Berlese, 1895)		1	3	2	5	12
Fuscozetes fuscipes (C.L. Koch, 1844)			1
Galumna lanceata (Oudemans, 1900)				1
Galumna obvia (Berlese, 1914)		1
Hypochthonius rufulus C.L. Koch, 1835					1
Liebstadia pannoica (Willmann, 1951)				1		1
Micreremus brevipes (Michael, 1888)	1		8	1	1	1
Neoribates aurantiacus (Oudemans, 1914)	1
Oribatella quadricornuta Michael, 1880	1
Oribatula tibialis (Nicolet, 1855)				1
Punctoribates hexagonus Berlese, 1908		3	5	1	4
Punctoribates punctum (C.L. Koch, 1839)			2		1	1
Scheloribates (Scheloribates) latipes (C.L. Koch, 1844)			2		2
Scutovertex minutus (C.L. Koch, 1835)			10
Tectocepheus sarekensis Trägårdh, 1910		1	1
Trichoribates novus (Sellnick, 1928)	3				1	3
Trichoribates trimaculatus (C.L. Koch, 1835)		1	1		1
Zetomimus furcatus (Warburton & Pearce, 1905)			1	1	1
Juveniles	1	1	2		2	1
number of individuals	9	9	39	18	26	21
number of species	6	6	12	9	11	7
