# Supplementary material for: Slow-moving soil organisms on a water highway: aquatic dispersal and survival potential of Oribatida and Collembola in running water
Source: Mov Ecol. 2019 Jul 2;7:20. doi: 10.1186/s40462-019-0165-5 (PMC6604229; doi:10.1186/s40462-019-0165-5)
Supplement: Supplementary file 4 — Species and numbers of Oribatida and Collembola found in the aquarium nets. (XLSX 11 kb) [file 40462_2019_165_MOESM4_ESM.xlsx]

## Sheet: Add. file 4 aquarium nets
	sample site 1		sample site 2	sample site 3		sample site 4
Oribatida taxa	2016	2017	2017	2016	2017	2016
Camisia horrida (Hermann, 1804)	1
Carabodes rugosior Berlese, 1916				1
Cymbaeremaeus cymba (Nicolet, 1855)						1
Dometorina plantivaga (Berlese, 1895)	3				3	5
Galumna lanceata (Oudemans, 1900)				1
Galumna obvia (Berlese, 1914)				1
Globozetes cf. longipilus Sellnick, 1928						1
Haffenrefferia gilvipes (C.L. Koch, 1839)			1
Hydrozetes lacustris (Michael, 1882)			1	1		1
Liochthonius tuxeni (Forsslund, 1957)						3
Nanhermannia pectinata Strenzke, 1953						1
Phauloppia lucorum (C.L. Koch, 1841)			1
Poecilochthonius spiciger (Berlese, 1910)						1
Protoribates dentatus (Berlese, 1883)						1
Punctoribates hexagonus Berlese, 1908	1		1		1
Punctoribates punctum (C.L. Koch, 1839)			1
Scheloribates (Scheloribates) ascendens Weigmann & Wunderle, 1990						1
Scheloribates (Scheloribates) latipes (C.L. Koch, 1844)						1
Trichoribates novus (Sellnick, 1928)					1	2
Trichoribates trimaculatus (C.L. Koch, 1835)		2				1
Zetomimus furcatus (Warburton & Pearce, 1905)					1
Juveniles			2	3		1
number of individuals	5	2	7	7	6	20
number of species	3	1	5	4	4	12
Collembola taxa
Desoria trispinata (MacGillivray, 1896)						1
Isotomurus plumosus Bagnall, 194	1	9			8
Neanura muscorum (Templeton, 1835)						1
Sminthurides aquaticus(Bourlet, 1842)	1	2	1	2	1
number of individuals	2	11	1	2	9	2
number of species	2	2	1	1	2	2
